# Supplementary material
Source: PubMed Central journal article supplement (PMC156268)
Supplement: pnas_0931462100_7.pdf [file pnas_0931462100_7.pdf]

# A

[Abs. Int. \* 10<sup>3</sup>]

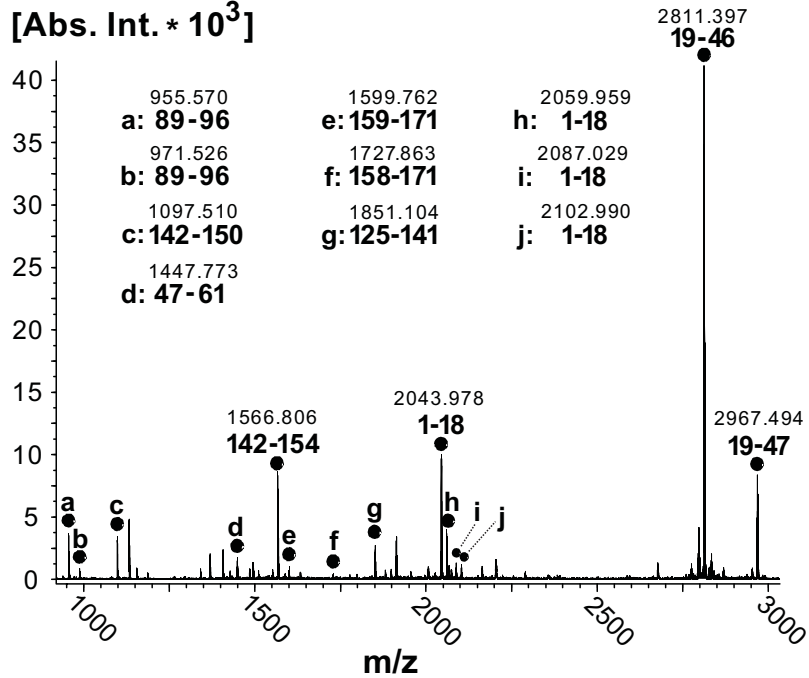

# B

10 20 30 40 50  
MDEKDVATQP QETGQNPRLS GQDEDGPRPE GAEAPPSEGA LAPHARRSEA  
60 70 80 90 100  
VGPKPPAPGG KLLSLKGDRA FQRLRKGRAG RGRYVSVKWL PAELRVGIY  
110 120 130 140 150  
VSKKVGKAVV RNKVKRRLRE ILRRLHLPQA HLLVVASPEA READFAELFR  
160 170  
DVVRALRKSG LVQHSHHHHH H
