# Supplementary material
Source: PubMed Central journal article supplement (PMC156268)

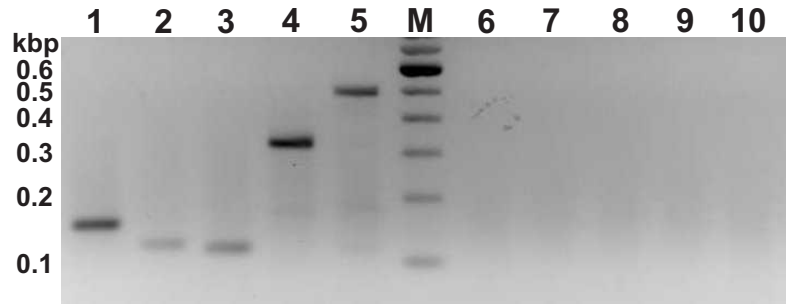

Supplement: pnas_0931462100_3.pdf [file pnas_0931462100_3.pdf]

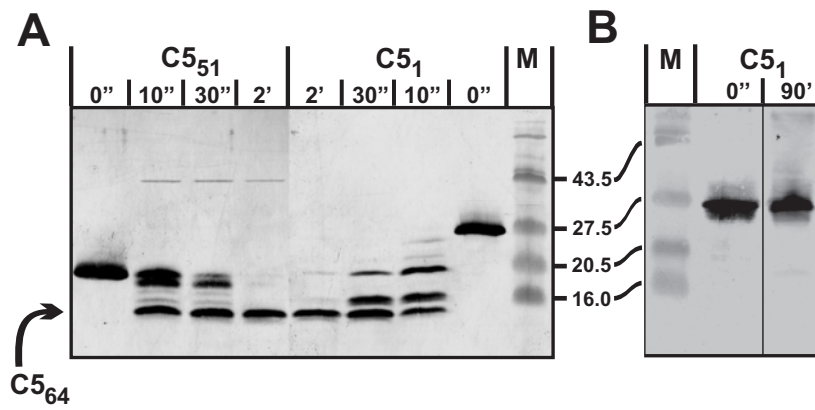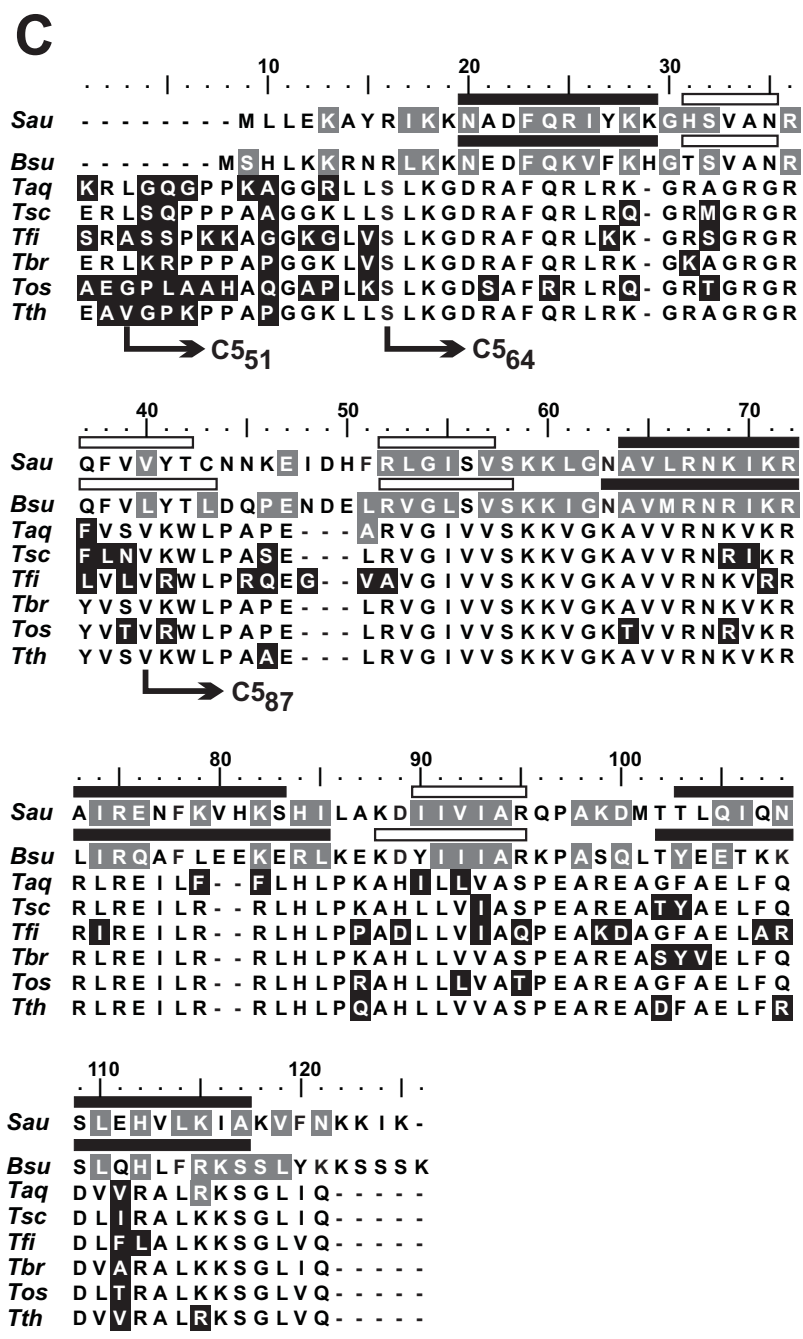

Supplement: pnas_0931462100_5.pdf [file pnas_0931462100_5.pdf]
